# Supplementary material for: DFT study of the fragmentation mechanism of uracil RNA base
Source: Royal Society of Chemistry journal article supplement (doi:10.1039/c2cp40384f), 2012-01-01
Supplement: c2cp40384f.pdf [file c2cp40384f.pdf]

## Supporting Information for :

# DFT study of the Fragmentation Mechanism of Uracil RNA bases

Leila SADR ARANI<sup>1</sup>, Pierre MIGNON<sup>1</sup>, Hassan ABDOUL-CARIME<sup>2</sup>, Bernadette FARIZON<sup>2</sup>, Michel FARIZON<sup>2</sup>,  
Henry CHERMETTE<sup>1</sup>,

<sup>1</sup> Université de Lyon; Université Claude Bernard Lyon1; Institut des Sciences Analytiques, CNRS UMR  
5280; 43 Bd du 11 novembre 1918; 69622 Villeurbanne, Cedex, FRANCE

<sup>2</sup> Université de Lyon; Université Claude Bernard-Lyon1; Institut de Physique Nucléaire de Lyon,  
CNRS/IN2P3 UMR 5822, 43 Bd du 11 novembre 1918, 69622 Villeurbanne Cedex, FRANCE

### Free energy diagrams :

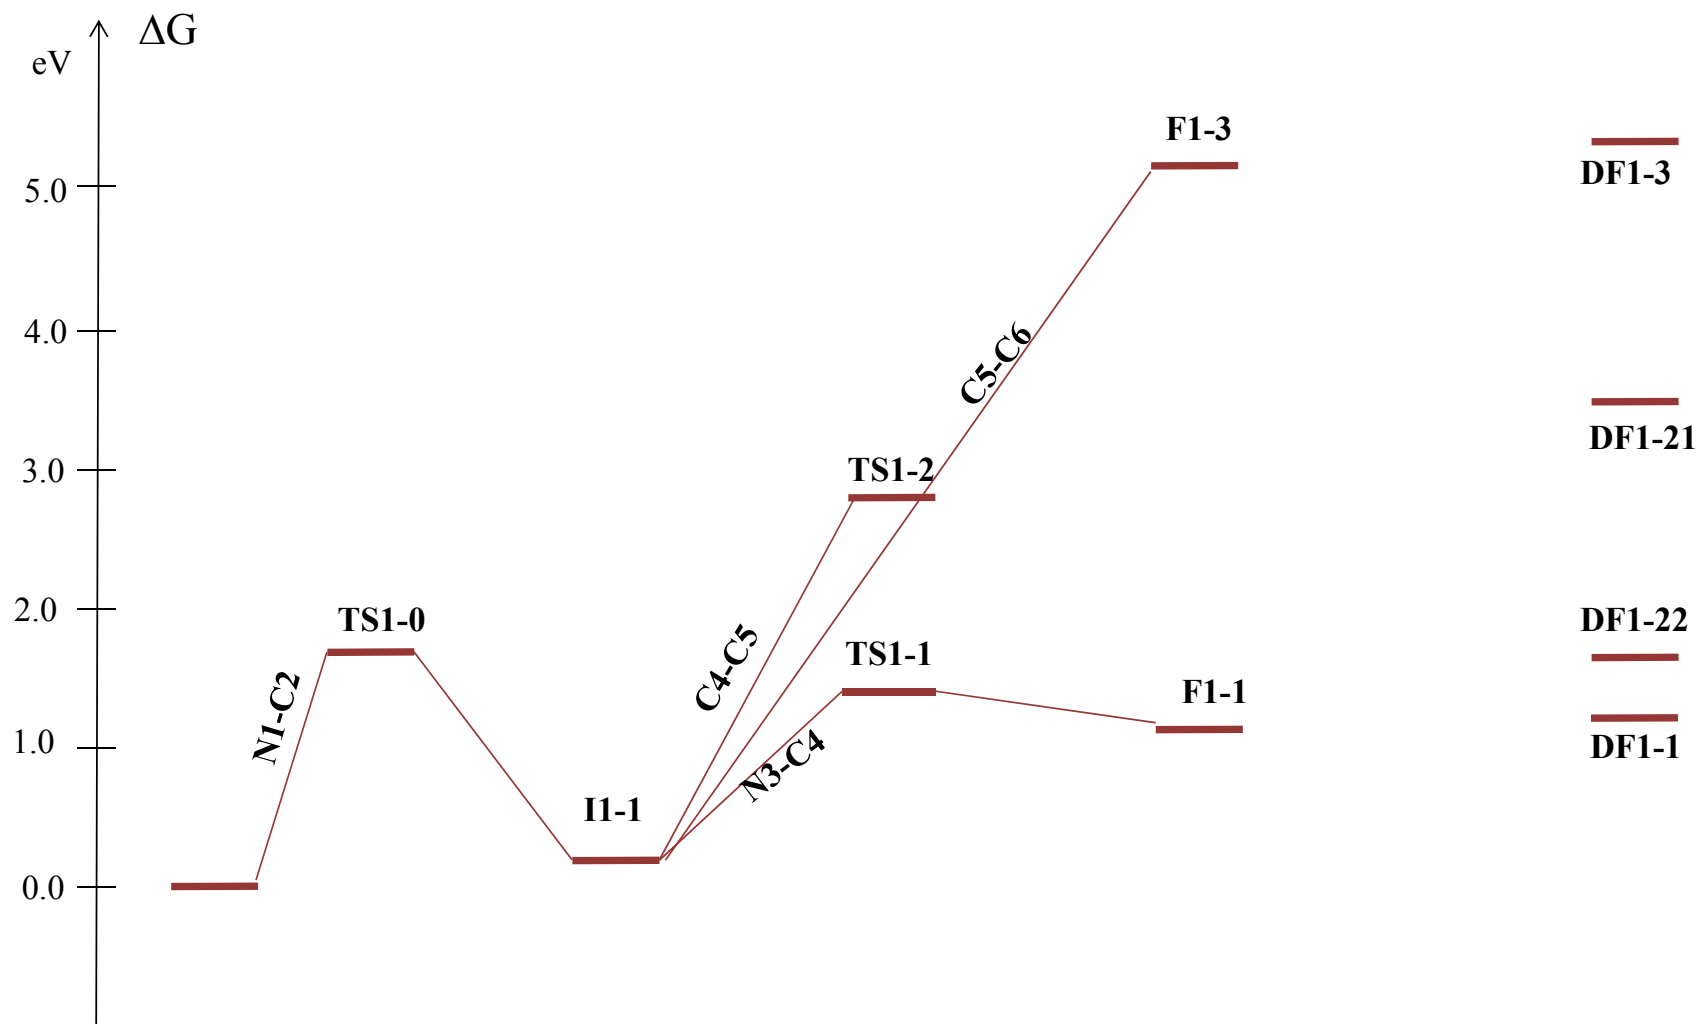

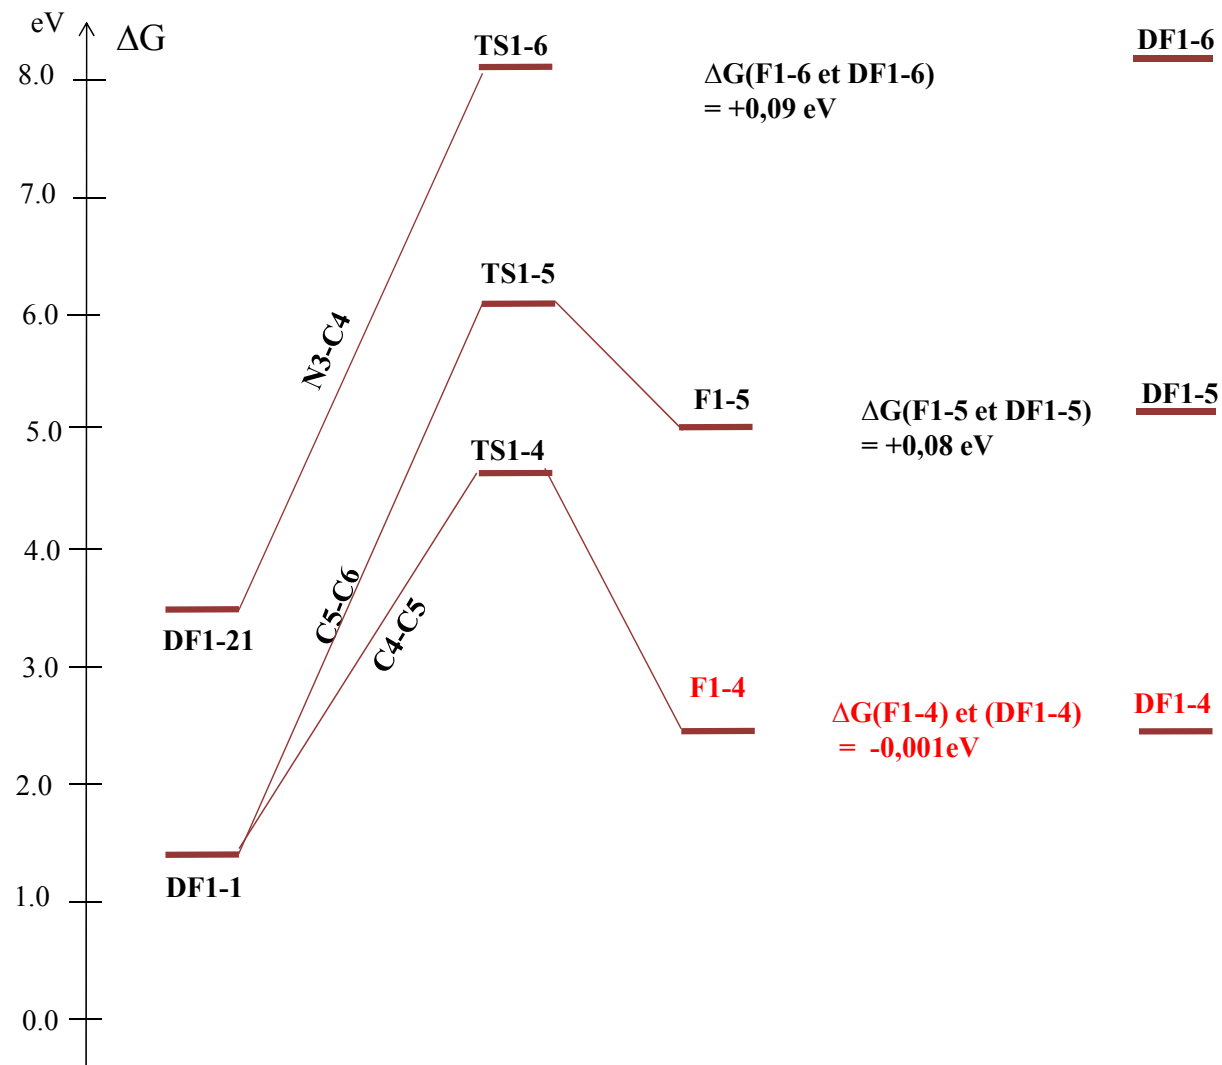

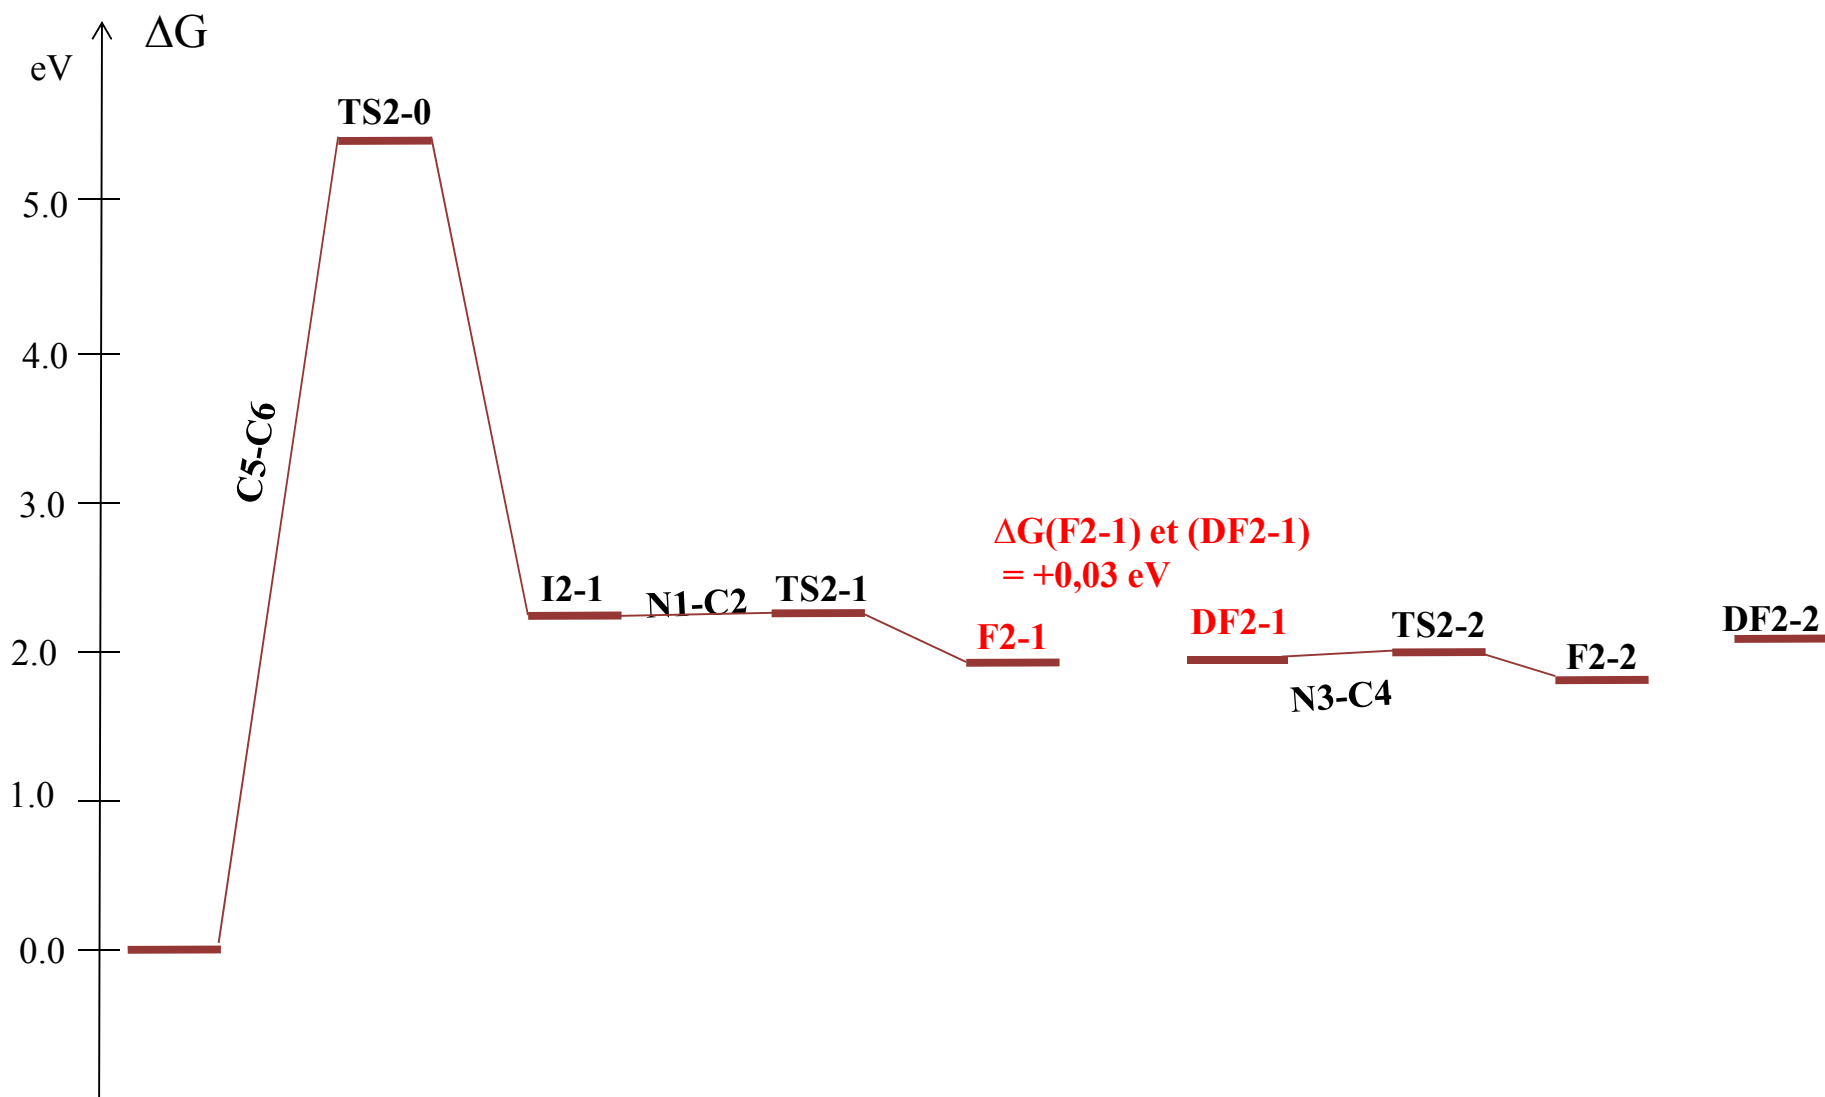

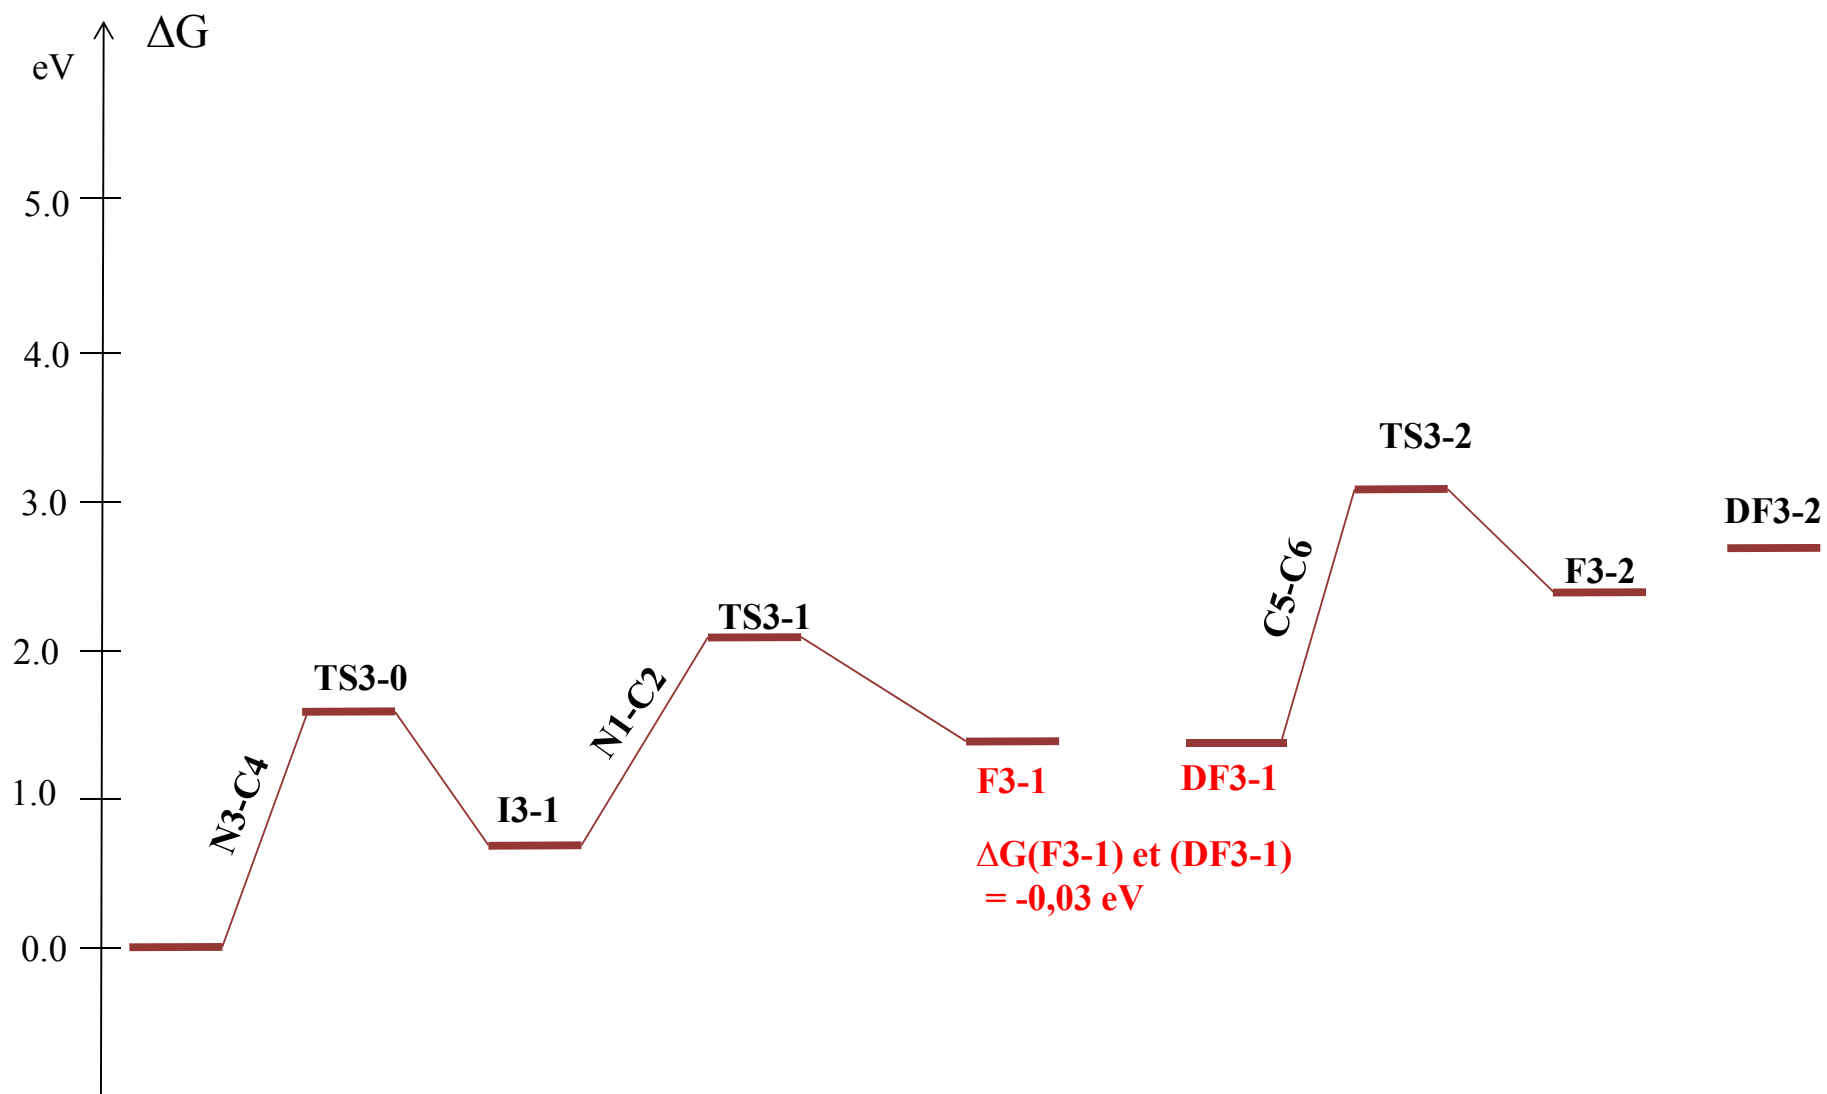

## **Cartesian Coordinates :**

Points of figure 3:

➤ U+ :

|   | X         | Y         | Z         |
|---|-----------|-----------|-----------|
| C | -0.000449 | 0.031297  | -0.000001 |
| N | 0.069143  | 1.404488  | -0.000006 |
| C | 1.234373  | 2.196311  | -0.000004 |
| C | 2.492120  | 1.434006  | 0.000005  |
| C | 2.474722  | 0.028920  | 0.000010  |
| N | 1.306713  | -0.604512 | 0.000008  |
| H | -0.829157 | 1.897679  | -0.000012 |
| H | 3.428133  | 1.992715  | 0.000007  |
| H | 3.385594  | -0.574665 | 0.000017  |
| O | 1.202480  | 3.420282  | -0.000009 |
| O | -0.992789 | -0.661847 | -0.000002 |
| H | 1.258068  | -1.630641 | 0.000011  |

➤ TS1-0

|   |           |           |           |
|---|-----------|-----------|-----------|
| C | -0.424159 | 0.340162  | 0.764681  |
| N | -0.076626 | 1.122235  | -0.160210 |
| C | 1.286384  | 2.089587  | -0.016236 |
| C | 2.510365  | 1.456531  | -0.418259 |
| C | 2.786525  | 0.086065  | -0.716873 |
| N | 1.876600  | -0.848653 | -0.637563 |
| H | -0.355718 | 0.889779  | -1.119702 |
| H | 3.336044  | 2.172359  | -0.454497 |
| H | 3.830270  | -0.115768 | -0.999863 |
| O | 1.055386  | 3.190639  | 0.362448  |
| O | -0.716911 | -0.288936 | 1.683988  |
| H | 2.282912  | -1.767557 | -0.868050 |

➤ I1-1

|   |           |           |           |
|---|-----------|-----------|-----------|
| C | -0.929799 | 0.846663  | 0.870423  |
| N | 0.162173  | 0.845358  | 0.262402  |
| C | 1.190794  | 1.775920  | 0.477615  |
| C | 2.423855  | 1.588060  | -0.299351 |
| C | 2.872564  | 0.394963  | -0.912168 |
| N | 2.152523  | -0.701861 | -1.022940 |
| H | 1.189113  | -0.718205 | -0.662420 |
| H | 3.099144  | 2.444032  | -0.294256 |
| H | 3.873256  | 0.371723  | -1.351537 |
| O | 1.171687  | 2.677099  | 1.311227  |

|   |           |           |           |
|---|-----------|-----------|-----------|
| O | -1.967601 | 0.735690  | 1.370656  |
| H | 2.524552  | -1.532465 | -1.485239 |

➤ TS1-1

|   |           |           |           |
|---|-----------|-----------|-----------|
| C | -1.125358 | 0.928631  | 0.325186  |
| N | -0.011020 | 0.407046  | 0.384269  |
| C | 1.826895  | 1.573954  | 1.141370  |
| C | 2.425116  | 1.579155  | -0.100727 |
| C | 2.696654  | 0.482419  | -0.940667 |
| N | 2.235660  | -0.741089 | -0.833077 |
| H | 1.462300  | -0.941966 | -0.189304 |
| H | 2.846925  | 2.555031  | -0.363743 |
| H | 3.390255  | 0.671513  | -1.763582 |
| O | 1.610785  | 1.799566  | 2.249881  |
| O | -2.206686 | 1.406556  | 0.266840  |
| H | 2.513633  | -1.455736 | -1.503086 |

➤ F1-1

|   |           |           |           |
|---|-----------|-----------|-----------|
| C | -1.779445 | 0.172663  | 0.600275  |
| N | -0.598574 | 0.275638  | 0.269213  |
| C | 2.202280  | 2.239165  | 0.734265  |
| C | 3.181691  | 1.658787  | 0.003881  |
| C | 3.045068  | 0.498475  | -0.780737 |
| N | 1.974996  | -0.239710 | -0.961180 |
| H | 1.054442  | -0.048922 | -0.523521 |
| H | 4.148977  | 2.166109  | 0.049361  |
| H | 3.946621  | 0.172880  | -1.304348 |
| O | 1.395567  | 2.759685  | 1.368598  |
| O | -2.915599 | 0.081390  | 0.923227  |
| H | 2.035923  | -1.058733 | -1.562113 |

➤ DF1-1 :

DF1-1b<sup>•</sup> :

|   |           |          |          |
|---|-----------|----------|----------|
| C | -1.197074 | 0.842177 | 0.385701 |
| N | -0.050484 | 0.390001 | 0.417667 |
| O | -2.307683 | 1.280164 | 0.354738 |

DF1-1a<sup>+</sup> :

|   |          |           |           |
|---|----------|-----------|-----------|
| C | 1.921218 | 1.661654  | 1.059382  |
| C | 2.657184 | 1.620383  | -0.076811 |
| C | 2.743824 | 0.517332  | -0.939447 |
| N | 2.155485 | -0.655792 | -0.831072 |
| H | 1.535345 | -0.908549 | -0.062146 |
| H | 3.211298 | 2.534659  | -0.306371 |

|   |          |           |           |
|---|----------|-----------|-----------|
| H | 3.381557 | 0.642719  | -1.817486 |
| O | 1.301721 | 1.712216  | 2.026882  |
| H | 2.312767 | -1.371886 | -1.537676 |

➤ TS1-2 :

|   |           |           |           |
|---|-----------|-----------|-----------|
| C | 0.428840  | 0.871688  | 2.372116  |
| N | 0.873027  | 1.401474  | 1.336547  |
| C | 1.839434  | 2.206217  | 1.042570  |
| C | 2.356115  | 1.437233  | -1.528288 |
| C | 2.258234  | 0.093172  | -1.733089 |
| N | 1.129771  | -0.635178 | -1.718506 |
| H | 0.220913  | -0.178675 | -1.731946 |
| H | 3.122468  | 2.139566  | -1.850366 |
| H | 3.181425  | -0.490367 | -1.874135 |
| O | 2.549553  | 3.106356  | 1.248727  |
| O | -0.068880 | 0.275891  | 3.227077  |
| H | 1.158123  | -1.629633 | -1.920597 |

➤ DF1-22 :

DF1-2a<sup>•</sup> :

|   |           |          |          |
|---|-----------|----------|----------|
| C | -0.903679 | 0.962834 | 1.599267 |
| N | -0.297496 | 1.746307 | 0.873521 |
| C | 0.829611  | 2.536866 | 1.018124 |
| O | 1.322087  | 3.291005 | 0.235765 |
| O | -1.572190 | 0.198837 | 2.193354 |

DF1-1b<sup>+</sup>:

|   |          |           |           |
|---|----------|-----------|-----------|
| C | 3.520293 | 0.822025  | -0.447486 |
| C | 2.846419 | -0.029506 | -1.138492 |
| N | 2.184279 | -0.864372 | -1.815258 |
| H | 1.157031 | -0.825117 | -1.860929 |
| H | 3.866073 | 1.755146  | -0.906698 |
| H | 3.754962 | 0.618226  | 0.603847  |
| H | 2.648503 | -1.614135 | -2.345348 |

➤ DF1-21

DF1-2a<sup>+</sup> :

|   |           |          |          |
|---|-----------|----------|----------|
| C | -0.885491 | 0.946971 | 1.605106 |
| N | 0.030456  | 1.444304 | 0.911946 |
| C | 0.654048  | 2.514966 | 0.734920 |



|   |           |          |          |
|---|-----------|----------|----------|
| O | 1.286277  | 3.437494 | 0.490363 |
| O | -1.706957 | 0.392114 | 2.177696 |

DF1-2b<sup>•</sup>:

|   |          |           |           |
|---|----------|-----------|-----------|
| C | 3.057347 | 1.323623  | -0.893727 |
| C | 3.112557 | 0.002055  | -0.899513 |
| N | 2.151908 | -0.896363 | -1.390130 |
| H | 1.497944 | -0.469667 | -2.044651 |
| H | 3.639897 | 2.146167  | -0.495579 |
| H | 3.966002 | -0.494683 | -0.409790 |
| H | 2.551905 | -1.748865 | -1.776973 |

➤ F1-3

|   |           |           |           |
|---|-----------|-----------|-----------|
| C | -0.411744 | 0.927015  | 0.849073  |
| N | 0.616088  | 1.138473  | 0.167830  |
| C | 1.024117  | 2.481660  | -0.237322 |
| C | 2.199921  | 2.534485  | -1.027790 |
| C | 2.996744  | -1.471730 | 0.179158  |
| N | 2.236007  | -0.864635 | -0.604740 |
| H | 1.547731  | -0.056241 | -0.260406 |
| H | 2.696186  | 3.410427  | -1.447023 |
| H | 3.740928  | -2.266380 | 0.049667  |
| O | 0.397455  | 3.485696  | 0.080776  |
| O | -1.341220 | 0.632004  | 1.474495  |
| H | 2.210445  | -1.077485 | -1.619841 |

➤ DF1-3

DF1-3b<sup>••</sup>:

|   |           |          |           |
|---|-----------|----------|-----------|
| C | -0.432074 | 0.920715 | 0.862832  |
| N | 0.531403  | 1.274899 | 0.194044  |
| C | 1.005744  | 2.530678 | -0.236192 |
| C | 2.195533  | 2.492866 | -1.019028 |
| H | 2.729012  | 3.341416 | -1.450612 |
| O | 0.457283  | 3.611545 | 0.025620  |
| O | -1.306098 | 0.437640 | 1.483375  |

DF1-3a<sup>•+</sup>:

|   |          |           |           |
|---|----------|-----------|-----------|
| C | 2.991610 | -1.458288 | 0.186265  |
| N | 2.226873 | -0.851445 | -0.605529 |
| H | 1.590865 | -0.108690 | -0.271084 |
| H | 3.730386 | -2.259154 | 0.055982  |

H 2.192120 -1.058894 -1.621796

Points of figure 4 :

➤ TS1-4

|   |          |           |           |
|---|----------|-----------|-----------|
| C | 1.974645 | 0.156330  | 2.025942  |
| C | 2.363604 | 1.998074  | -0.513472 |
| C | 2.487594 | 0.837163  | -1.044019 |
| N | 2.411151 | -0.471458 | -1.073646 |
| H | 2.333800 | -0.944888 | -0.169119 |
| H | 2.888489 | 2.925477  | -0.293952 |
| H | 2.514901 | 1.503327  | -2.014210 |
| O | 1.705533 | 0.262333  | 3.122842  |
| H | 2.379064 | -1.001021 | -1.939695 |

➤ F1-4

|   |          |           |           |
|---|----------|-----------|-----------|
| C | 0.767361 | -0.486783 | 1.848875  |
| C | 3.402940 | 1.980619  | -1.316662 |
| C | 2.910547 | 0.836840  | -0.985906 |
| N | 2.418091 | -0.268883 | -0.639580 |
| H | 1.831854 | -0.363681 | 0.237011  |
| H | 4.394611 | 2.278270  | -0.960893 |
| H | 2.835176 | 2.660022  | -1.960688 |
| O | 0.146207 | -0.541165 | 2.794870  |
| H | 2.573850 | -1.113475 | -1.205234 |

➤ DF1-4 :

DF1-4a+ :

|   |          |           |           |
|---|----------|-----------|-----------|
| C | 0.767361 | -0.486783 | 1.848875  |
| C | 3.402940 | 1.980619  | -1.316662 |
| C | 2.910547 | 0.836840  | -0.985906 |
| N | 2.418091 | -0.268883 | -0.639580 |
| H | 1.831854 | -0.363681 | 0.237011  |
| H | 4.394611 | 2.278270  | -0.960893 |
| H | 2.835176 | 2.660022  | -1.960688 |
| O | 0.146207 | -0.541165 | 2.794870  |
| H | 2.573850 | -1.113475 | -1.205234 |

DF1-4b :

|   |          |          |          |
|---|----------|----------|----------|
| C | 0.000000 | 0.000000 | 1.581248 |
| O | 0.000000 | 0.000000 | 2.721842 |

➤ TS1-5

|   |          |           |           |
|---|----------|-----------|-----------|
| C | 2.376517 | 1.136969  | 0.986140  |
| C | 2.638107 | 2.383022  | 0.725752  |
| C | 2.551798 | 0.401595  | -1.535787 |
| N | 2.089936 | -0.655282 | -1.087460 |
| H | 1.879342 | -0.669308 | -0.000792 |
| H | 3.499252 | 3.040734  | 0.665120  |
| H | 2.867525 | 0.763338  | -2.519254 |
| O | 1.901089 | 0.077719  | 1.314778  |
| H | 1.886809 | -1.515494 | -1.622997 |

➤ F1-5

|   |          |           |           |
|---|----------|-----------|-----------|
| C | 2.560072 | 1.924363  | 0.529971  |
| C | 3.138376 | 2.852335  | 0.023537  |
| C | 2.175967 | -0.983151 | -1.087467 |
| N | 2.313328 | -1.711042 | -1.960648 |
| H | 1.277886 | 1.019080  | 1.639786  |
| H | 3.627433 | 3.715975  | -0.382269 |
| H | 2.012956 | -0.290016 | -0.196560 |
| O | 1.993466 | 0.810301  | 1.000389  |
| H | 2.443957 | -2.342236 | -2.749909 |

➤ DF1-5

DF1-5a<sup>+</sup> :

|   |            |             |             |
|---|------------|-------------|-------------|
| C | 2.18541360 | -0.90202201 | -0.98333370 |
| N | 2.36088700 | -1.67833900 | -1.93419700 |
| H | 2.01884108 | -0.31512470 | -0.20365098 |
| H | 2.74849543 | -1.73498942 | -2.87476986 |

DF1-5b :

|   |          |          |           |
|---|----------|----------|-----------|
| C | 2.543151 | 1.881414 | 0.524643  |
| C | 3.102401 | 2.797807 | -0.032657 |
| H | 1.225112 | 1.093121 | 1.617598  |
| H | 3.617477 | 3.629714 | -0.462618 |
| O | 1.970817 | 0.815736 | 1.049739  |

Points of figure 4 :

➤ TS1-6

|   |           |           |          |
|---|-----------|-----------|----------|
| C | -0.295844 | -0.289008 | 1.532488 |
| N | 0.408301  | 0.648975  | 1.038572 |
| C | 0.149220  | 4.461059  | 0.877895 |
| O | 0.199722  | 5.586622  | 0.759040 |
| O | -0.934123 | -1.158583 | 1.982157 |

➤ DF1-6

DF1-6a<sup>+</sup> :

|   |           |           |          |
|---|-----------|-----------|----------|
| C | -1.163957 | -0.375052 | 0.000000 |
| N | -0.532516 | 0.786931  | 0.000000 |
| O | -1.705620 | -1.390733 | 0.000000 |

DF1-6b :

|   |          |          |          |
|---|----------|----------|----------|
| C | 0.000000 | 0.000000 | 1.581248 |
| O | 0.000000 | 0.000000 | 2.721842 |

Les points de figure 5 :

➤ TS2-0

|   |           |           |           |
|---|-----------|-----------|-----------|
| C | 0.034372  | 0.500376  | 0.548710  |
| N | 0.149482  | 1.356766  | -0.502516 |
| C | 1.285829  | 1.664459  | -1.306207 |
| C | 2.481896  | 0.903558  | -1.229995 |
| C | 1.905152  | 0.161684  | 2.123193  |
| N | 1.431715  | -0.051767 | 0.985646  |
| H | -0.722463 | 1.801345  | -0.800446 |
| H | 3.417423  | 1.043683  | -1.780436 |
| H | 2.862248  | -0.108591 | 2.583756  |
| O | 1.234625  | 2.588597  | -2.116497 |
| O | -0.928416 | 0.154508  | 1.164060  |
| H | 1.947340  | -0.606513 | 0.222208  |

➤ I2-1

|   |           |           |           |
|---|-----------|-----------|-----------|
| C | -0.161406 | 0.101088  | 0.174814  |
| N | 0.011065  | 1.393170  | -0.026456 |
| C | 1.250859  | 2.249797  | -0.041284 |
| C | 2.307213  | 1.837404  | -0.905939 |
| C | 2.114007  | -1.445980 | 0.735749  |
| N | 1.423764  | -0.598006 | 0.365354  |
| H | -0.850598 | 1.940379  | 0.079385  |
| H | 3.233989  | 2.408880  | -0.865663 |
| H | 2.796274  | -2.219784 | 1.067258  |
| O | 1.198218  | 3.277517  | 0.613938  |
| O | -1.009019 | -0.709697 | 0.285984  |
| H | 2.184970  | 1.045892  | -1.644434 |

➤ TS2-1

|   |           |           |           |
|---|-----------|-----------|-----------|
| C | -0.151076 | 0.143611  | 0.213105  |
| N | 0.092782  | 1.406456  | -0.051477 |
| C | 1.373267  | 2.238977  | -0.059508 |
| C | 2.318730  | 1.925183  | -1.075873 |
| C | 2.025841  | -1.548093 | 0.934422  |
| N | 1.437411  | -0.656966 | 0.493193  |
| H | -0.749610 | 1.989478  | 0.014773  |
| H | 3.237298  | 2.510650  | -1.098522 |
| H | 2.617182  | -2.364340 | 1.330668  |
| O | 1.407047  | 3.172017  | 0.722315  |
| O | -1.020847 | -0.635561 | 0.348654  |
| H | 2.132811  | 1.159663  | -1.828566 |

➤ F2-1

|   |           |           |           |
|---|-----------|-----------|-----------|
| C | -0.583079 | 0.410335  | -0.325719 |
| N | -0.193287 | 1.595004  | -0.138428 |
| C | 1.391078  | 2.154448  | -0.204723 |
| C | 2.183569  | 1.414350  | -1.110605 |
| C | 2.497821  | -1.339604 | 1.568198  |
| N | 1.867566  | -0.638568 | 0.895959  |
| H | -0.826799 | 2.264609  | 0.311677  |
| H | 3.230498  | 1.704539  | -1.188829 |
| H | 3.078833  | -1.993921 | 2.199972  |
| O | 1.564510  | 3.101221  | 0.493598  |
| O | -0.889016 | -0.673898 | -0.567457 |
| H | 1.780559  | 0.609700  | -1.720645 |

➤ DF2-1

DF2-1a<sup>•+</sup>:

|   |           |           |           |
|---|-----------|-----------|-----------|
| C | -0.338968 | 0.390198  | -0.337283 |
| N | -0.119260 | 1.573391  | 0.038805  |
| C | 1.319703  | 2.496796  | -0.121146 |
| C | 2.328907  | 1.790247  | -0.817921 |
| H | -0.860088 | 2.105283  | 0.511560  |
| H | 3.278690  | 2.307771  | -0.959188 |
| O | 1.211915  | 3.567309  | 0.377830  |
| O | -0.427666 | -0.693900 | -0.723491 |
| H | 2.183442  | 0.783141  | -1.207009 |

DF2-1b:

|   |          |           |          |
|---|----------|-----------|----------|
| C | 2.133008 | -1.546912 | 0.000000 |
| N | 1.485058 | -0.585184 | 0.000000 |
| H | 2.737682 | -2.437620 | 0.000000 |

➤ TS2-2

|   |           |           |           |
|---|-----------|-----------|-----------|
| C | -0.605455 | 0.594625  | -0.892871 |
| N | -0.236730 | 1.766199  | -0.704879 |
| C | 1.681934  | 2.511049  | 0.230691  |
| C | 2.554632  | 1.860152  | -0.628115 |
| H | -0.858961 | 2.544052  | -0.941568 |
| H | 3.471666  | 2.398658  | -0.891673 |
| O | 1.320286  | 3.223763  | 1.060163  |
| O | -0.812753 | -0.542659 | -1.018423 |
| H | 2.345828  | 0.859667  | -1.002328 |

➤ F2-2

|   |           |           |           |
|---|-----------|-----------|-----------|
| C | -0.360185 | 0.158190  | -0.928148 |
| N | -0.134485 | 1.377372  | -0.996444 |
| C | 1.684824  | 2.698982  | 0.855488  |
| C | 2.049248  | 2.016683  | -0.266716 |
| H | -0.430610 | 1.930439  | -1.803135 |
| H | 2.280627  | 2.594132  | -1.164435 |
| O | 1.330242  | 3.261820  | 1.789632  |
| O | -0.503381 | -0.976708 | -0.715020 |
| H | 2.437526  | 1.002866  | -0.142182 |

➤ DF2-2

DF2-2a<sup>•+</sup>:

|   |          |          |           |
|---|----------|----------|-----------|
| C | 1.672147 | 2.446125 | 0.258863  |
| C | 2.390214 | 1.846503 | -0.754791 |
| H | 3.483512 | 1.803990 | -0.669465 |
| O | 1.078766 | 2.941645 | 1.097089  |
| H | 1.844485 | 1.434962 | -1.613819 |

DF2-2b:

|   |           |           |           |
|---|-----------|-----------|-----------|
| C | -0.773659 | 0.563678  | -0.697710 |
| N | -0.463833 | 1.731621  | -0.511439 |
| H | -1.100259 | 2.440107  | -0.160627 |
| O | -0.915064 | -0.586084 | -0.924866 |



Points of figure 6 :

➤ TS3-0

|   |           |           |           |
|---|-----------|-----------|-----------|
| C | -0.113379 | 0.579411  | 0.080093  |
| N | -0.359584 | 1.458833  | 1.033919  |
| C | 2.316589  | 2.124289  | -0.781690 |
| C | 2.901774  | 0.968312  | -0.368844 |
| C | 2.266591  | -0.165482 | 0.146758  |
| N | 0.976426  | -0.365735 | 0.376576  |
| H | -1.320301 | 1.828683  | 1.078726  |
| H | 3.990494  | 0.958486  | -0.480855 |
| H | 2.917192  | -1.006611 | 0.396326  |
| O | 1.895136  | 3.124324  | -1.155253 |
| O | -0.591833 | 0.604577  | -1.058499 |
| H | 0.688367  | -1.285112 | 0.717755  |

➤ I3-1

|   |           |           |           |
|---|-----------|-----------|-----------|
| C | 0.113557  | 0.758574  | 0.284259  |
| N | -1.083649 | 0.552102  | 0.725190  |
| C | 1.944029  | 2.022824  | -0.801759 |
| C | 2.793660  | 0.864947  | -0.530758 |
| C | 2.295470  | -0.261132 | 0.094854  |
| N | 1.004980  | -0.293881 | 0.474429  |
| H | -1.701555 | 1.361021  | 0.564605  |
| H | 3.835200  | 0.919604  | -0.847290 |
| H | 2.898410  | -1.145925 | 0.304917  |
| O | 2.235285  | 3.041390  | -1.348712 |
| O | 0.560938  | 1.867237  | -0.321874 |
| H | 0.599647  | -1.113797 | 0.940749  |

➤ TS3-1

|   |           |           |           |
|---|-----------|-----------|-----------|
| C | -0.278054 | 1.181764  | 0.122838  |
| N | -1.117849 | 0.855095  | 0.906304  |
| C | 2.044289  | 2.054740  | -0.783167 |
| C | 2.806915  | 0.862789  | -0.563142 |
| C | 2.335631  | -0.406706 | -0.118695 |
| N | 1.083105  | -0.578250 | 0.184084  |
| H | -1.845126 | 1.366385  | 1.401766  |
| H | 3.875086  | 1.010247  | -0.741958 |
| H | 3.085514  | -1.205042 | -0.031934 |
| O | 2.265567  | 3.173169  | -1.052024 |
| O | 0.346536  | 1.754015  | -0.783778 |
| H | 0.855146  | -1.516239 | 0.543535  |

➤ F3-1

|   |           |           |           |
|---|-----------|-----------|-----------|
| C | -0.625468 | 1.363817  | -0.449659 |
| N | -1.230732 | 0.643281  | 0.328985  |
| C | 2.781313  | 2.038093  | -0.315317 |
| C | 2.804878  | 0.756693  | -0.821049 |
| C | 2.240533  | -0.302821 | -0.043138 |
| N | 1.609681  | 0.015813  | 1.056161  |
| H | -1.755344 | 0.957477  | 1.144416  |
| H | 3.281372  | 0.621169  | -1.796532 |
| H | 2.374427  | -1.322666 | -0.430677 |
| O | 2.842016  | 3.104557  | 0.093366  |
| O | 0.014885  | 1.897277  | -1.284517 |
| H | 1.197346  | -0.811345 | 1.512050  |

➤ DF3-1

DF3-1a<sup>•+</sup>

|   |          |           |          |
|---|----------|-----------|----------|
| C | 1.664772 | 2.295340  | 0.000000 |
| C | 2.740749 | 1.406218  | 0.000000 |
| C | 2.425126 | 0.018669  | 0.000000 |
| N | 1.143014 | -0.264874 | 0.000000 |
| H | 3.749047 | 1.834817  | 0.000000 |
| H | 3.254195 | -0.703585 | 0.000000 |
| O | 0.844319 | 3.087141  | 0.000000 |
| H | 0.960532 | -1.281259 | 0.000000 |

DF3-1b :

|   |           |           |           |
|---|-----------|-----------|-----------|
| C | -0.773659 | 0.563678  | -0.697710 |
| N | -0.463833 | 1.731621  | -0.511439 |
| H | -1.100259 | 2.440107  | -0.160627 |
| O | -0.915064 | -0.586084 | -0.924866 |

À partir d'ici, il faut ajouter DF3-1b :

➤ TS3-2

|   |          |           |           |
|---|----------|-----------|-----------|
| C | 1.775710 | 2.630198  | 0.955705  |
| C | 2.888875 | 1.942879  | 0.746512  |
| C | 2.277934 | -0.657633 | -0.466550 |
| N | 1.192117 | -0.957254 | -0.686033 |
| H | 3.894834 | 2.290071  | 0.983226  |
| H | 3.332831 | -0.480014 | -0.304089 |
| O | 0.693981 | 3.070412  | 1.058939  |
| H | 0.206456 | -1.152910 | -0.852691 |

➤ F3-2

|   |          |           |           |
|---|----------|-----------|-----------|
| C | 2.430091 | 2.985032  | -0.472123 |
| C | 3.049076 | 1.786085  | -0.277060 |
| C | 1.533906 | -0.719761 | 0.229732  |
| N | 0.999888 | -1.736568 | 0.417882  |
| H | 4.142429 | 1.738070  | -0.313055 |
| H | 2.404774 | 0.835027  | -0.077117 |
| O | 1.841760 | 3.958349  | -0.623904 |
| H | 0.536016 | -2.621574 | 0.582541  |

➤ DF3-2

DF3-2a<sup>•+</sup>:

|   |          |          |           |
|---|----------|----------|-----------|
| C | 1.672147 | 2.446125 | 0.258863  |
| C | 2.390214 | 1.846503 | -0.754791 |
| H | 3.483512 | 1.803990 | -0.669465 |
| O | 1.078766 | 2.941645 | 1.097089  |
| H | 1.844485 | 1.434962 | -1.613819 |

DF3-1b:

|   |          |           |          |
|---|----------|-----------|----------|
| C | 1.579283 | -0.727918 | 0.279637 |
| N | 0.996986 | -1.742252 | 0.415093 |
| H | 0.493541 | -2.607734 | 0.535425 |
